# Supplementary material
Source: PubMed Central journal article supplement (PMC1913796)
Supplement: plntphys_pp.107.097253_3.pdf [file plntphys_pp.107.097253_3.pdf]

## SUPPLEMENTAL FIGURE LEGENDS

**Supplemental Figure S1.** Photoinhibition of PSII in wild type and photorespiratory pathway mutants during incubation in light in air. Attached leaves of wild type and photorespiratory pathway mutants were exposed to light at  $200 \mu\text{mol photons m}^{-2} \text{s}^{-1}$  in air. Maximal photochemical efficiency of PSII ( $F_v/F_m$ ) was measured after dark adaptation for 15 min. Values are mean  $\pm$  S.D. (bars) of results from three independent experiments.

**Supplemental Figure S2.** Immunoblotting analysis of the D1 protein in wild type and photorespiratory pathway mutants. Leaf discs ( $78.5 \text{ mm}^2$ ) were floated on water and exposed to light at  $200 \mu\text{mol photons m}^{-2} \text{s}^{-1}$  in air for 30 min. Thylakoid membranes were prepared from leaf discs and thylakoid proteins (corresponding to  $7.85 \text{ mm}^2$ ) were separated by NuPAGE Novex 4-12% Bis-Tris gel electrophoresis.
