# Supplementary material
Source: PubMed Central journal article supplement (PMC1913796)

## Supplemental Figure S1

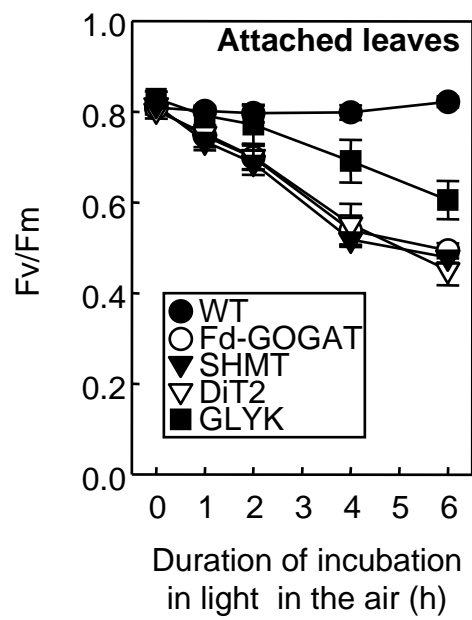

Supplement: plntphys_pp.107.097253_1.pdf [file plntphys_pp.107.097253_1.pdf]

## Supplemental Figure S2

Immunoblotting  
against D1 protein

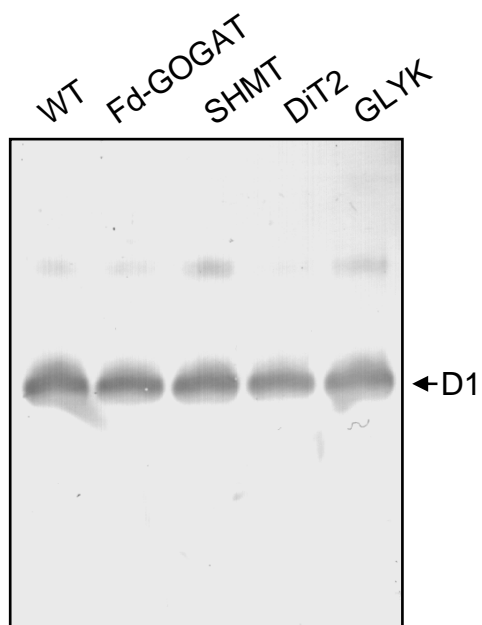

Supplement: plntphys_pp.107.097253_2.pdf [file plntphys_pp.107.097253_2.pdf]
